# Supplementary material for: Clinical Assessment and Management of Delirium in the Palliative Care Setting
Source: PubMed Central journal article supplement — Drugs. 2017 Sep 1;77(15):1623–43. doi: 10.1007/s40265-017-0804-3 (PMC5613058; doi:10.1007/s40265-017-0804-3), 2017-09-01
Supplement: 40265_2017_804_MOESM1_ESM.pdf [file 40265_2017_804_MOESM1_ESM.pdf]

## Clinical Assessment and Management of Delirium in the Palliative Care Setting: Appendix

Journal: Drugs

**Open Access** This Article is distributed under the terms of the Creative Commons Attribution-NonCommercial 4.0 International License (<http://creativecommons.org/licenses/by-nc/4.0/>), which permits any noncommercial use, distribution, and reproduction in any medium, provided you give appropriate credit to the original author(s) and the source, provide a link to the Creative Commons license, and indicate if changes were made.

### Authors and affiliations:

Shirley Harvey Bush MBBS, MRCGP, FACHPM (Corresponding author)

Department of Medicine, University of Ottawa;

Bruyère Research Institute (BRI);

Ottawa Hospital Research Institute (OHRI);

Bruyère Continuing Care

[sbush@bruyere.org](mailto:sbush@bruyere.org)

Sallyanne Tierney B.Sc.Phm

Bruyère Continuing Care

Peter Gerard Lawlor MB, FRCPI, MMedSc

Department of Medicine, University of Ottawa;

Bruyère Research Institute (BRI);

Ottawa Hospital Research Institute (OHRI);

Bruyère Continuing Care

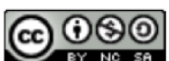

**Appendix: Medications\* used for the management of delirium symptoms in palliative care [derived from references 1-3, and other references as indicated in the text]**

*While every effort has been made to ensure the accuracy of this text and medication doses, please also consult a pharmacist/pharmacy references and the manufacturer's Summary of Product Characteristic when prescribing these medications.*

\* No medication is currently licenced for use in the management of delirium. The use of medications for delirium management is therefore 'off-label'.

**Note:** There is currently very little literature detailing antipsychotic dose equivalency. There remains limited information from rigorous prospective randomized drug-drug comparison studies.

Some authors have suggested using a 2:1 ratio for PO: parenteral dosing for antipsychotics but, in clinical practice, clinicians tend to use a 1:1 ratio.

**Abbreviations:**

PO = by mouth

Subcut. = subcutaneous

IM = intramuscular

PR = per rectum

IV = intravenous

CSCI = continuous subcutaneous infusion

CIVI = continuous intravenous infusion

IR = immediate release

p.r.n. = pro re nata (when required)

CYP = cytochrome P450

EPS = extrapyramidal side effects

AP = antipsychotic

BDZ = benzodiazepine

EOL = end of life

**“First-Generation” Antipsychotics (Formerly called “Typical”):**

|                    |                        |                                                                                                                                                                                                                                                                                                                                                                                                                                                                      |
|--------------------|------------------------|----------------------------------------------------------------------------------------------------------------------------------------------------------------------------------------------------------------------------------------------------------------------------------------------------------------------------------------------------------------------------------------------------------------------------------------------------------------------|
| <b>Haloperidol</b> | Pharmacology           | <p>A butyrophenone antipsychotic<br/> Dopamine D<sub>2</sub> antagonist<br/> Onset of action: 10-15 mins Subcut.; &gt;1 hour PO<br/> Time to peak plasma concentration: 2-6 hours (PO); 10-20 mins (Subcut.)<br/> Plasma half-life: 13-35 hours<br/> Average bioavailability of oral haloperidol is 60% -70% [4]<br/> However, in clinical practice most clinicians tend to use a 1:1 ratio for PO: Subcutaneous dosing<br/> Substrate of CYP1A2, CYP2D6, CYP3A4</p> |
|                    | Advantages             | <p>Can be administered PO, Subcut., IM, and IV. (Note: ECG monitoring is recommended with IV haloperidol)<br/> Antiemetic properties</p>                                                                                                                                                                                                                                                                                                                             |
|                    | <b>Starting dose</b>   | <p>Haloperidol 0.5-1mg PO (if patient willing to cooperate for oral dose) or Subcut. stat<br/> Add p.r.n. dose: e.g. 0.5 or 1mg PO/Subcut. q1h p.r.n.<br/> If scheduled dosing required: haloperidol 0.5-1mg PO/Subcut. 2 to 3 times daily</p> <ul style="list-style-type: none"> <li>In elderly or frail patient, start with lower doses, e.g. 0.25-0.5mg, and titrate gradually</li> </ul>                                                                         |
|                    | Usual effective dose   | <p>Usual maximum: &lt;5mg/24h<br/> Past prospective studies reported dose ranges of 0.25 - 10mg/day [5]</p>                                                                                                                                                                                                                                                                                                                                                          |
|                    | <b>Adverse effects</b> | <p>Extrapyramidal side effects (EPS) can occur, especially at higher doses:</p> <ul style="list-style-type: none"> <li>Incidence is increased in slow metabolizers of CYP2D6 substrate, and reduced with parenteral administration</li> </ul> <p>May prolong QTc interval</p>                                                                                                                                                                                        |
|                    | Other comments         | <ul style="list-style-type: none"> <li>IV administration requires ECG monitoring [6]</li> <li>Increased risk of <i>torsade des pointes</i>, ventricular fibrillation and sudden cardiac death if QTc interval &gt;500msec or an increase of ≥60msec from baseline</li> <li>Avoid using in patients with Parkinson’s disease or dementia with Lewy bodies because of the risk of EPS</li> </ul>                                                                       |

|                                                                          |                        |                                                                                                                                                                                                                                                                                                                                                                                                                           |
|--------------------------------------------------------------------------|------------------------|---------------------------------------------------------------------------------------------------------------------------------------------------------------------------------------------------------------------------------------------------------------------------------------------------------------------------------------------------------------------------------------------------------------------------|
| <b>Levomepromazine</b><br>(known as methotrimeprazine in some countries) | Pharmacology           | A phenothiazine antipsychotic<br>Dopamine D <sub>2</sub> antagonist<br>Also H <sub>1</sub> , ACh, α <sub>1</sub> adrenoreceptor, 5-HT <sub>2</sub> antagonist<br>Onset of action: 30 mins<br>Time to peak plasma concentration: 2-3 hours (PO); 30-90 mins (Subcut.)<br>Plasma half-life: 15-30 hours<br>Average bioavailability of oral levomepromazine is approx. 40%<br>Substrate of CYP 3A4 (minor)                   |
|                                                                          | Advantages             | Sedating - may be advantageous in agitated patients<br>Also antiemetic (use in lower doses for just antiemetic effect)<br>Some analgesic effect<br>Can be administered PO, Subcut. or deep IM                                                                                                                                                                                                                             |
|                                                                          | <b>Starting dose</b>   | Levomepromazine 5-12.5mg PO or Subcut. stat<br>Add p.r.n. dose: e.g. 5-12.5mg PO/Subcut. q2h p.r.n.<br>If scheduled dosing required: levomepromazine 10-25mg/24h in divided doses (2 to 3 times daily) <ul style="list-style-type: none"> <li>• In elderly or frail patient, consider lower starting dose, e.g. 2.5mg</li> <li>• Higher starting dose may be required in very agitated palliative care patient</li> </ul> |
|                                                                          | Usual effective dose   | 50-100mg/24hrs<br>Higher doses (up to 200mg/24h) may be required at the very end of life                                                                                                                                                                                                                                                                                                                                  |
|                                                                          | <b>Adverse effects</b> | Postural hypotension, paradoxical agitation, extrapyramidal side effects, anticholinergic effects                                                                                                                                                                                                                                                                                                                         |
|                                                                          | Other comments         | Note: Much longer time to peak concentration for Subcut. route compared with haloperidol<br>Can cause inflammatory skin reaction at subcutaneous injection site: consider diluting with 0.9% saline if this occurs                                                                                                                                                                                                        |

|                       |                        |                                                                                                                                                                                                                                                                                                                                                                          |
|-----------------------|------------------------|--------------------------------------------------------------------------------------------------------------------------------------------------------------------------------------------------------------------------------------------------------------------------------------------------------------------------------------------------------------------------|
| <b>Chlorpromazine</b> | Pharmacology           | A phenothiazine antipsychotic – <i>same class as Levomepromazine (methotrimeprazine)</i><br>Onset of action: 15 mins (IM – short-acting injection); 30-60mins (PO)<br>Oral bioavailability: around 32%<br>Substrate of CYP2D6 (major), CYP1A2 (minor), CYP3A4 (minor); inhibits CYP2E1 (weak)                                                                            |
|                       | Advantages             | Sedating<br>Can be administered PO, PR, deep IM and IV (Availability of product formulations is country-dependent)<br>(For deep IM and direct IV injections, administer <i>slowly</i> )<br>(For direct IV injection, <i>dilute</i> solution with normal saline; can also administer as slow IV infusion)<br>Rapid control of agitation (onset 15 mins) with IV route [7] |
|                       | <b>Starting dose</b>   | Chlorpromazine 12.5-25mg PO or PR stat [8]<br>Then, 12.5-50mg every 4 to 6 hours [9]<br><br>In the elderly, use doses in the lower range of recommended adult dosing<br>Use with caution in patients with renal and hepatic impairment                                                                                                                                   |
|                       | Usual effective dose   | 50-150mg/24hrs [10]<br>(In the elderly, use doses in the lower range of recommended adult dosing)                                                                                                                                                                                                                                                                        |
|                       | <b>Adverse effects</b> | Postural hypotension, sedation, extrapyramidal side effects, anticholinergic effects<br>May prolong QTc interval<br>May increase the risk for falls due to orthostatic hypotension and somnolence                                                                                                                                                                        |
|                       | Other comments         | Chlorpromazine may cause local irritation with parenteral use [8]                                                                                                                                                                                                                                                                                                        |

**“Second-Generation” Antipsychotics (Formerly called “Atypical”):**

|                   |                        |                                                                                                                                                                                                                                                                                                                                                                                |
|-------------------|------------------------|--------------------------------------------------------------------------------------------------------------------------------------------------------------------------------------------------------------------------------------------------------------------------------------------------------------------------------------------------------------------------------|
| <b>Olanzapine</b> | Pharmacology           | 5-HT <sub>2A</sub> and dopamine D <sub>2</sub> antagonist<br>Onset of action: hours-days in delirium<br>Time to peak plasma concentration: 5-8 hours<br>Plasma half-life: 34 hours (52 hours in elderly)<br>Average bioavailability of oral olanzapine is approx. 60%<br>Substrate of CYP1A2 (major), CYP2D6 (minor);<br>Inhibits DYP1A2 (weak), CYP2C19 (weak), CYP2C9 (weak) |
|                   | Advantages             | Sedating (Therefore avoid using in patients with hypoactive delirium)<br>Can be administered PO, IM or Subcut. [11]<br>Available as oral disintegrating tablet (ODT)<br>Antiemetic and anxiolytic properties [12]                                                                                                                                                              |
|                   | <b>Starting dose</b>   | Olanzapine 2.5-5mg PO or Subcut. daily (usually at bedtime)<br><i>(Caution combining with benzodiazepine as risk of oversedation and respiratory depression)</i><br>Reduce dose in elderly and patients with hepatic impairment                                                                                                                                                |
|                   | Usual effective dose   | 2.5-5mg PO/Subcut. at bedtime; may need to increase to 10mg at bedtime<br>(Maximum daily dose is 20mg orally)                                                                                                                                                                                                                                                                  |
|                   | <b>Adverse effects</b> | Drowsiness<br>Orthostatic hypotension<br>Metabolic effects (long term use)                                                                                                                                                                                                                                                                                                     |
|                   | Other comments         | The parenteral preparation of olanzapine has been administered subcutaneously with no injection site toxicity observed [11]                                                                                                                                                                                                                                                    |
|                   |                        | From Breitbart’s open-label study, patients with a poorer response to olanzapine were >70 years old (most predictive), had a history of dementia, CNS spread of cancer, hypoxia (as delirium etiology), delirium of ‘severe’ intensity (classified as Memorial Delirium Assessment Scale (MDAS) score >23) or hypoactive delirium. [13]                                        |

|                   |                                                                    |                                                                                                                                                                                                                                                                                                                         |
|-------------------|--------------------------------------------------------------------|-------------------------------------------------------------------------------------------------------------------------------------------------------------------------------------------------------------------------------------------------------------------------------------------------------------------------|
| <b>Quetiapine</b> | Pharmacology                                                       | 5-HT <sub>2A</sub> and weak dopamine D <sub>2</sub> antagonist<br>Onset of action (IR): hours in delirium<br>Time to peak plasma concentration ( <i>for immediate-release (IR) tablet format</i> ): 1.5 hours<br>Plasma half-life (IR): 6 hours (10-14 hours in elderly)<br>Substrate of CYP2D6 (minor), CYP3A4 (major) |
|                   | Advantages                                                         | Sedating<br>Less likely to cause EPS than other atypical AP<br>Antidepressant effect (low doses) [10]                                                                                                                                                                                                                   |
|                   | <b>Starting dose</b><br>( <i>Immediate release tablet format</i> ) | Quetiapine (IR) 25mg PO 2 times daily<br>If necessary, increase dose in 25-50mg increments<br>Reduce dose in elderly and patients with hepatic impairment [14]                                                                                                                                                          |
|                   | Usual effective dose                                               | 40-100mg/24h                                                                                                                                                                                                                                                                                                            |
|                   | <b>Adverse effects</b>                                             | Drowsiness, dizziness<br>Postural hypotension                                                                                                                                                                                                                                                                           |
|                   | Other comments                                                     | Oral route only                                                                                                                                                                                                                                                                                                         |
|                   |                                                                    | In patients with sleep-wake disturbance, sedating effects may be beneficial                                                                                                                                                                                                                                             |

|                    |                        |                                                                                                                                                                                                                                                                                                                                                    |
|--------------------|------------------------|----------------------------------------------------------------------------------------------------------------------------------------------------------------------------------------------------------------------------------------------------------------------------------------------------------------------------------------------------|
| <b>Risperidone</b> | Pharmacology           | 5-HT <sub>2A</sub> and dopamine D <sub>2</sub> antagonist<br>Onset of action: hours-days in delirium<br>Time to peak plasma concentration: 1-2 hours<br>Plasma half-life: 24 hours (clearance reduced by renal impairment)<br>Substrate of CYP2D6 (major), CYP3A4 (minor), P-glycoprotein                                                          |
|                    | Advantages             | Available as oral disintegrating tablet (ODT)                                                                                                                                                                                                                                                                                                      |
|                    | <b>Starting dose</b>   | Risperidone 0.5mg PO 2 times daily<br>If necessary, increase dose by 0.5mg 2 times daily every 2 <sup>nd</sup> day<br>Reduce dose in elderly and patients with severe renal or hepatic impairment [14]<br>(Elderly without dementia: Max dose = 2mg/day<br>CrCl <30ml/min: Max dose = 1.5mg/day<br>Severe hepatic dysfunction: Max dose = 1mg/day) |
|                    | Usual effective dose   | Usual maintenance dose: 1mg/24h<br>Uncommon to use >3mg/24h<br>(Increased risk EPS if dose >6mg/24h)                                                                                                                                                                                                                                               |
|                    | <b>Adverse effects</b> | Insomnia, agitation, anxiety, drowsiness<br>Postural hypotension                                                                                                                                                                                                                                                                                   |
|                    | Other comments         | Oral route only                                                                                                                                                                                                                                                                                                                                    |
|                    |                        | In Kim's randomized, single-blind clinical trial, the response to risperidone was significantly poorer in patients ≥ 70 years old [15]                                                                                                                                                                                                             |

**“Third-Generation” Antipsychotic:**

|                     |                        |                                                                                                                                                                                                                                                                                                                                                                                                                                                                                                                                                                                               |
|---------------------|------------------------|-----------------------------------------------------------------------------------------------------------------------------------------------------------------------------------------------------------------------------------------------------------------------------------------------------------------------------------------------------------------------------------------------------------------------------------------------------------------------------------------------------------------------------------------------------------------------------------------------|
| <b>Aripiprazole</b> | Pharmacology           | <p>Has a unique pharmacological profile [16]<br/> A quinolinone antipsychotic<br/> Dopamine D<sub>2</sub> partial agonist, 5-HT<sub>1A</sub> partial agonist, and 5-HT<sub>2A</sub> antagonist</p> <p>Onset of action: 1 to 3 weeks<br/> Time to peak plasma concentration: oral 3-5 hours, IM immediate release: 1-3 hours<br/> Half-life: 75 hours (up to 146 hours in poor metabolizers of 2D6)<br/> Steady state reached: within 14 days of dosing.<br/> Average oral bioavailability is 87% (tablet), higher for oral solution [16]<br/> Substrate of CYP2D6 (major); CYP3A4 (major)</p> |
|                     | Advantages             | <p>Can be administered PO or IM<br/> Available as oral disintegrating tablet (ODT), and oral solution<br/> Less EPS</p>                                                                                                                                                                                                                                                                                                                                                                                                                                                                       |
|                     | <b>Starting dose</b>   | <p>Aripiprazole 5mg PO or IM (immediate-release) daily<br/> Reduce dose in elderly: oral 2-5mg daily;<br/> IM immediate-release: initial 2.5mg to 10mg once; a repeat dose of 2.5 – 5mg may be given at 2 hours or greater intervals, NOT to exceed 15mg/day<br/> Reduce dose by 50% in poor metabolizers of CYP2D6</p>                                                                                                                                                                                                                                                                       |
|                     | Usual effective dose   | <p>5-20mg PO/IM daily<br/> (Maximum oral dose is 30mg once daily)<br/> For Geriatric – dementia psychosis (off-label use): max oral dose is 15mg per day</p>                                                                                                                                                                                                                                                                                                                                                                                                                                  |
|                     | <b>Adverse effects</b> | <p>Headache 27%; Agitation (oral 19%, injection &lt;1%);<br/> Anxiety, insomnia, nervousness, dizziness, sedation</p>                                                                                                                                                                                                                                                                                                                                                                                                                                                                         |
|                     | Other comments         | <p>Negligible effect on QTc interval in healthy patients [17]<br/> Little effect: prolactin levels, serum glucose and lipids [18]</p>                                                                                                                                                                                                                                                                                                                                                                                                                                                         |
|                     |                        | <p>Partial agonism at D2 receptor may lead to improvement in attention, concentration, and sleep-wake cycle reversal in delirium [18]</p>                                                                                                                                                                                                                                                                                                                                                                                                                                                     |
|                     |                        | <p>Systemic clearance strongly reduced by SSRI antidepressants paroxetine and fluvoxamine [16]<br/> <i>CYP2D6 and CYP3A4 drug-drug interactions, consult pharmacist/ pharmacy references for further details</i></p>                                                                                                                                                                                                                                                                                                                                                                          |
|                     |                        | <p>In an open-trial of oral aripiprazole in 21 hospitalized cancer patients, delirium resolution rate after 7 days was higher in patients with hypoactive delirium, than the hyperactive patient cohort. Patients in the hyperactive cohort were older and had more frequent cognitive deficits, such as dementia [19]</p>                                                                                                                                                                                                                                                                    |



**Benzodiazepines (BDZs):**      **Note:** Specific BDZ antagonist = Flumazenil.

|                  |                        |                                                                                                                                                                                                                                                                                                                                                                                                                                                                                                                                                      |
|------------------|------------------------|------------------------------------------------------------------------------------------------------------------------------------------------------------------------------------------------------------------------------------------------------------------------------------------------------------------------------------------------------------------------------------------------------------------------------------------------------------------------------------------------------------------------------------------------------|
| <b>Midazolam</b> | Pharmacology           | <p>Short-acting benzodiazepine (BDZ)</p> <p>Water soluble</p> <p>GABA mimetic</p> <p>(Affinity of midazolam for GABA receptor is 5-6 times greater than that of lorazepam)</p> <p>Onset of action: 5-10 mins Subcut; 2-3mins IV</p> <p>Plasma half-life: 1-4 hours</p> <p>Duration of action: 5mg &lt;4hours, but interindividual variation</p> <p>Renal impairment: CrCL &lt;10ml/min: Decrease dose by 50%</p> <p>Hepatic impairment: Caution</p> <p>Substrate of CYP2B6 (minor), CYP3A4 (major);</p> <p>Inhibits CYP2C8 (weak), CYP2C9 (weak)</p> |
|                  | Advantages             | <p>Can be administered Subcut. or IV (may also be given IM)</p> <p>Rapid onset with rapid anxiolytic action</p> <p>Dose-dependent sedative effect</p> <p>Anticonvulsant</p> <p>BDZs are treatment of choice as monotherapy for alcohol or BDZ withdrawal</p>                                                                                                                                                                                                                                                                                         |
|                  | <b>Starting dose</b>   | <p>Midazolam 2.5mg Subcut. q1h p.r.n., up to 5mg maximum</p> <p>Reduce dose in elderly/frail and in patients with non-malignant COPD e.g. 0.5-1mg Subcut. q1h p.r.n.</p> <p>If repeated doses needed for refractory agitated delirium at the end of life, consider 'palliative sedation' and continuous Midazolam CADD infusion:</p> <p>Usual initial rate 0.5-1mg/h CSCI or CIVI</p>                                                                                                                                                                |
|                  | Usual effective dose   | <p>1-6mg/h CSCI or CIVI</p> <p>(BDZ tolerant patients may require higher doses)</p> <p>In extremely agitated patients, bolus/p.r.n. dose may need to be increased to 2.5-5mg q30-60mins p.r.n.</p>                                                                                                                                                                                                                                                                                                                                                   |
|                  | <b>Adverse effects</b> | <p>Dose dependent sedation, dizziness, incoordination</p> <p>Increased risk of falls</p> <p>Cognitive effects: deliriogenic, can cause amnesia</p> <p>Possible paradoxical reactions [20], with increased agitation, anxiety, insomnia</p>                                                                                                                                                                                                                                                                                                           |
|                  | Other comments         | <p>Use lower doses in frail or elderly patients</p> <p>Short half-life</p> <p>Titrate according to clinical response</p>                                                                                                                                                                                                                                                                                                                                                                                                                             |
|                  |                        | <p><u>Cautions:</u> (unless using in imminently dying patient) severe pulmonary insufficiency, severe liver disease, myasthenia gravis</p>                                                                                                                                                                                                                                                                                                                                                                                                           |
|                  |                        | <p><u>Caution:</u> concurrent use with high dose olanzapine (Fatalities from oversedation or cardiorespiratory depression have been reported)</p>                                                                                                                                                                                                                                                                                                                                                                                                    |

|                  |                        |                                                                                                                                                                                                                                                                                                                                                                                                                                                                                                                                                                                |
|------------------|------------------------|--------------------------------------------------------------------------------------------------------------------------------------------------------------------------------------------------------------------------------------------------------------------------------------------------------------------------------------------------------------------------------------------------------------------------------------------------------------------------------------------------------------------------------------------------------------------------------|
| <b>Lorazepam</b> | Pharmacology           | Intermediate-acting BDZ, half-life 12-24 hrs<br>GABA mimetic.<br>Peak effect approx. 30mins after IV administration [21],<br>approx. 2hrs after PO or IM administration<br><br>Plasma half-life: 10-20 hours<br>In end stage renal disease, half-life elimination is approx. 18 hrs.<br>Substrate: unknown                                                                                                                                                                                                                                                                     |
|                  | Advantages             | Can be administered PO, Sublingual, Subcut. or IV<br>Rapid onset<br>(N.B. If dry mouth, moisten mucous membranes before sublingual/buccal administration)<br>Anticonvulsant<br>BDZs are treatment of choice as monotherapy for alcohol or BDZ withdrawal                                                                                                                                                                                                                                                                                                                       |
|                  | <b>Starting dose</b>   | Lorazepam 1mg Subcut. stat (up to 2mg maximum)<br>- Use lower dose (e.g. 0.5mg) if co-administration with antipsychotic<br>Reduce dose in elderly/frail and in patients with non-malignant COPD e.g. 0.25-0.5mg Subcut. stat<br>For rapid tranquillisation of agitated patient, may need to be administered every 60mins<br><br><b>Note: Lorazepam 1mg equivalent to Midazolam 2mg [22]</b><br><br>If repeated doses needed for refractory agitated delirium at the end of life, consider 'palliative sedation':<br>Lorazepam intermittent bolus: 0.05mg/kg every 2-4 hrs [21] |
|                  | Usual effective dose   | 1-2mg Subcut. q6-8h                                                                                                                                                                                                                                                                                                                                                                                                                                                                                                                                                            |
|                  | <b>Adverse effects</b> | Increased risk of falls<br>Cognitive effects: deliriogenic, can cause amnesia<br>Possible paradoxical agitation                                                                                                                                                                                                                                                                                                                                                                                                                                                                |
|                  | Other comments         | Subcut. injection may be irritating to tissues as it is in a propylene glycol diluent<br>Injectable drug should be refrigerated                                                                                                                                                                                                                                                                                                                                                                                                                                                |
|                  |                        | Less versatile for rapid titration than midazolam due to slower pharmacokinetics                                                                                                                                                                                                                                                                                                                                                                                                                                                                                               |
|                  |                        | Use lower doses in frail or elderly patients                                                                                                                                                                                                                                                                                                                                                                                                                                                                                                                                   |
|                  |                        | <u>Cautions:</u> (unless using in imminently dying patient) severe pulmonary insufficiency, severe liver disease, myasthenia gravis                                                                                                                                                                                                                                                                                                                                                                                                                                            |
|                  |                        | <u>Caution:</u> concurrent use with high dose olanzapine (fatalities from oversedation or cardiorespiratory depression have been reported)                                                                                                                                                                                                                                                                                                                                                                                                                                     |

**Other classes of medications:**

|                                                |                                                                                    |                                                                                                                                                                                                                                                                                                                                                                                                                                                                    |
|------------------------------------------------|------------------------------------------------------------------------------------|--------------------------------------------------------------------------------------------------------------------------------------------------------------------------------------------------------------------------------------------------------------------------------------------------------------------------------------------------------------------------------------------------------------------------------------------------------------------|
| <p><b>Phenobarbital</b><br/>Phenobarbitone</p> | <p>Pharmacology</p>                                                                | <p>Barbiturate<br/>GABA-mimetic<br/>A strong inducer of CYP3A and glucuronidation, thus reducing plasma concentrations of many drugs<br/>Onset of action after Subcut. administration 20-30 mins<br/>Plasma half-life: 2-6 days</p>                                                                                                                                                                                                                                |
|                                                | <p>Advantages</p>                                                                  | <p>Used in patients requiring 'palliative sedation' for refractory agitated delirium at the EOL<br/><br/>Rapid onset (<b>Note: Need for loading dose</b>)<br/>May be useful in patients who have marked tolerance to benzodiazepines<br/>Anticonvulsant</p>                                                                                                                                                                                                        |
|                                                | <p><b>Starting dose if refractory agitated delirium not responding to BDZ:</b></p> | <p>Loading dose of Phenobarbital 60-120mg, by Subcut. or IM route, followed by 60mg 2 to 3 times daily<br/>From clinical experience, higher initial loading dose (e.g. 120mg) and higher scheduled Phenobarbital doses may be needed if delirious patient remains agitated despite optimisation of a Midazolam CADD infusion<br/>Dose should be titrated to desired effect or level of sedation<br/>Phenobarbital may also be given as a CSCI or CIVI infusion</p> |
|                                                | <p>Usual effective dose</p>                                                        | <p>200 to 1200mg/24 hours<br/>Doses up to 3,800mg/24hrs have been reported</p>                                                                                                                                                                                                                                                                                                                                                                                     |
|                                                | <p><b>Adverse effects</b></p>                                                      | <p>Paradoxical excitement in the elderly, agranulocytosis, thrombocytopenia, allergic skin reactions &lt;3%, Stevens-Johnson syndrome (very rare)</p>                                                                                                                                                                                                                                                                                                              |
|                                                | <p>Other comments</p>                                                              | <p>Undiluted injection can be irritant as it is formulated in a mixture with propylene glycol<br/>IM injection can be given undiluted, otherwise dilute with WFI (water for injection) for Subcut. injection<br/>May also be given as slow diluted IV bolus, given over 2 mins<br/><b>Note: Phenobarbital should never be mixed with another drug due to incompatibilities</b></p>                                                                                 |
|                                                |                                                                                    | <p>Also used:</p> <ul style="list-style-type: none"> <li>• In management of status epilepticus</li> <li>• As an alternative anticonvulsant in patients who are no longer able to take their usual PO maintenance anticonvulsant</li> </ul>                                                                                                                                                                                                                         |

## References:

- [1] Twycross R, Wilcock A, Howard P, editors. PCF5: Palliative Care Formulary. 5<sup>th</sup> ed. Nottingham: Palliativedrugs.com Ltd; 2014.
- [2] Lexicomp: Version 3.0.1. Wolters Kluwer Clinical Drug Information, Inc, 2017.
- [3] Procyshyn RM, Bezchlibnyk-Butler KZ, Jeffries JJ, editors. Clinical handbook of psychotropic drugs. 21st ed. Boston: Hogrefe Publishing; 2015.
- [4] Kudo S, Ishizaki T. Pharmacokinetics of Haloperidol: An Update. Clin Pharmacokinet. 1999;73(6):435-456.
- [5] Meagher DJ, McLoughlin L, Leonard M, Hannon N, Dunne C, O'Regan N. What do we really know about the treatment of delirium with antipsychotics? Ten key issues for delirium pharmacotherapy. Am J Geriatr Psychiatry. 2013;21(12):1223-38.
- [6] U.S. Food & Drug Administration (FDA). <http://www.fda.gov>. Accessed 25 Feb 2017.
- [7] Hui D, Dev R, Bruera E. Neuroleptics in the management of delirium in patients with advanced cancer. Curr Opin Support Palliat Care. 2016;10(4):316-323.
- [8] Attard A, Ranjith G, Taylor D. Delirium and its treatment. CNS Drugs. 2008;22(8):631-44.
- [9] Breitbart W, Alici Y. Evidence-based treatment of delirium in patients with cancer. J Clin Oncol. 2012;30(11):1206-14.
- [10] Grassi L, Caruso R, Hammelef K, Nanni MG, Riba M. Efficacy and safety of pharmacotherapy in cancer-related psychiatric disorders across the trajectory of cancer care: a review. Int Rev Psychiatry. 2014;26(1):44-62.
- [11] Elsayem A, Bush SH, Munsell MF, Curry EA, Calderon B, Paraskevopoulos T, Fadul N, Bruera E. Subcutaneous olanzapine for hyperactive or mixed delirium in advanced cancer patients: a preliminary study. J Pain Symptom Manage. 2010;40(5):774-82.
- [12] Passik SD, Lundberg J, Kirsh KL, Theobald D, Donaghy K, Holtsclaw E, et al. A pilot exploration of the antiemetic activity of olanzapine for the relief of nausea in patients with advanced cancer and pain. J Pain Symptom Manage. 2002;23(6):526-32.
- [13] Breitbart W, Tremblay A, Gibson C. An open trial of olanzapine for the treatment of delirium in hospitalized cancer patients. Psychosomatics. 2002;43(3):175-82.
- [14] Sheehan JJ, Sliwa JK, Amatniek JC, Grinspan A, Canuso CM. Atypical antipsychotic metabolism and excretion. Curr Drug Metab. 2010;11(6):516-25.
- [15] Kim SW, Yoo JA, Lee SY, Kim SY, Bae KY, Yang SJ, et al. Risperidone versus olanzapine for the treatment of delirium. Hum Psychopharmacol. 2010;25(4):298-302.

- [16] de Bartolomeis A, Tomasetti C, Iasevoli F. Update on the mechanism of action of aripiprazole: Translational insights into antipsychotic strategies beyond dopamine receptor antagonism. *CNS Drugs*. 2015;29(9):773-99.
- [17] Polcwiartek C, Sneider B, Graff C, Taylor D, Meyer J, Kanters JK, et al. The cardiac safety of aripiprazole treatment in patients at high risk for torsade: a systematic review with a meta-analytic approach. *Psychopharmacology (Berl)*. 2015;232(18):3297-308.
- [18] Straker DA, Shapiro PA, Muskin PR. Aripiprazole in the treatment of delirium. *Psychosomatics*. 2006;47(5):385-91.
- [19] Boettger S, Breitbart W. An open trial of aripiprazole for the treatment of delirium in hospitalized cancer patients. *Palliat Support Care*. 2011;9(4):351-7.
- [20] Cheng C, Roemer-Becuwe C, Pereira J. When midazolam fails. *J Pain Symptom Manage*. 2002;23(3):256-65.
- [21] Cherny NI, Radbruch L. European Association for Palliative Care (EAPC) recommended framework for the use of sedation in palliative care. *Palliat Med*. 2009;23(7):581-93.
- [22] Barr J, Zomorodi K, Bertaccini EJ, Shafer SL, Geller E. A double-blind, randomized comparison of i.v. lorazepam versus midazolam for sedation of ICU patients via a pharmacologic model. *Anesthesiology*. 2001;95(2): 286-98.
